# Supplementary material for: High-throughput and simultaneous quantitative analysis of homocysteine–methionine cycle metabolites and co-factors in blood plasma and cerebrospinal fluid by isotope dilution LC–MS/MS
Source: PubMed Central journal article supplement (PMC5203846; doi:10.1007/s00216-016-0003-1), 2016-10-18
Supplement: 216_2016_3_MOESM1_ESM.pdf [file 216_2016_3_MOESM1_ESM.pdf]

## **Analytical and Bioanalytical Chemistry**

### **Electronic Supplementary Material**

#### **High-throughput and simultaneous quantitative analysis of homocysteine–methionine cycle metabolites and co-factors in blood plasma and cerebrospinal fluid by isotope dilution LC–MS/MS**

Seu Ping Guiraud, Ivan Montoliu, Laeticia Da Silva, Loïc Dayon, Antonio Núñez Galindo, John Corthésy, Martin Kussmann, Francois-Pierre Martin

**Table S1** List of analyzed compounds and internal standard (IS) stock solutions using same dilution solutions. These solutions were stored at -20°C until use for 3 months

| <b>Analyte</b>   | <b>Targeted concentration(<math>\mu\text{g/mL}</math>)</b> | <b>Concentration and solution type</b>                                        |
|------------------|------------------------------------------------------------|-------------------------------------------------------------------------------|
| homocysteic acid | 2500.0                                                     | 0.1 M HCl                                                                     |
| taurine          | 2500.0                                                     | MeOH/H <sub>2</sub> O (10/90)                                                 |
| serine           | 2500.0                                                     | 0.1 M HCl                                                                     |
| cystine          | 2500.0                                                     | 1 M HCl                                                                       |
| glycine          | 2500.0                                                     | 0.1 M HCl                                                                     |
| homocystine      | 2500.0                                                     | 0.1 M NaOH                                                                    |
| riboflavin       | 250.0                                                      | 0.1 M NaOH                                                                    |
| methionine       | 2500.0                                                     | 0.1 M HCl                                                                     |
| pyridoxine       | 250.0                                                      | 0.1 M HCl                                                                     |
| cystathionine    | 250.0                                                      | 0.1 M HCl                                                                     |
| SAH              | 250.0                                                      | 0.1 M HCl                                                                     |
| pyridoxamine     | 250.0                                                      | 0.1 M HCl                                                                     |
| SAM              | 250.0                                                      | 0.1 M HCl                                                                     |
| DMG              | 2500.0                                                     | MeOH/H <sub>2</sub> O 10/90                                                   |
| betaine          | 2500.0                                                     | MeOH/H <sub>2</sub> O 10/90                                                   |
| choline          | 2500.0                                                     | MeOH/H <sub>2</sub> O 50/50                                                   |
| 5-MTHF           | 250.0                                                      | NH <sub>4</sub> OAc 10 mmol/L, ascorbic acid 10 %, DTT 2% in H <sub>2</sub> O |

**Table S2** Working range of all metabolites for plasma and CSF analyses

| <b>Analyte</b>   | <b>Conc. Range</b> |        | <b>Units</b> |
|------------------|--------------------|--------|--------------|
| Homocysteic acid | 2                  | - 250  | μM           |
| taurine          | 4                  | - 500  | μM           |
| serine           | 4                  | - 500  | μM           |
| cystine          | 2                  | - 250  | μM           |
| glycine          | 4                  | - 500  | μM           |
| homocystine      | 2                  | - 250  | μM           |
| riboflavin       | 4                  | - 500  | nM           |
| methionine       | 2                  | - 250  | μM           |
| pyridoxine       | 2                  | - 250  | nM           |
| cystathionine    | 4                  | - 500  | nM           |
| SAH              | 8                  | - 1000 | nM           |
| pyridoxamine     | 2                  | - 250  | nM           |
| SAM              | 8                  | - 1000 | nM           |
| DMG              | 0.8                | - 100  | μM           |
| betaine          | 2                  | - 250  | μM           |
| choline          | 0.8                | - 100  | μM           |
| 5-MTHF           | 8                  | - 1000 | nM           |

**Table S3** Internal standard (IS) working solution concentrations for spiking

| <b>Analyte</b>                                                        | <b>Concentration</b> | <b>Units</b> |
|-----------------------------------------------------------------------|----------------------|--------------|
| homocysteic acid_d4                                                   | 1000                 | μM           |
| taurine_ <sup>13</sup> C <sub>2</sub>                                 | 2000                 | μM           |
| serine-d <sub>3</sub>                                                 | 2000                 | μM           |
| cystine_d4                                                            | 1000                 | μM           |
| glycine_d2                                                            | 2000                 | μM           |
| homocystine_d8                                                        | 1000                 | μM           |
| riboflavin_ <sup>13</sup> C <sub>4</sub> <sup>15</sup> N <sub>2</sub> | 2                    | μM           |
| methionine_d3                                                         | 1000                 | μM           |
| pyridoxine_d2                                                         | 1                    | μM           |
| cystathionine_d4                                                      | 2                    | μM           |
| SAH_d4                                                                | 4                    | μM           |
| pyridoxamine_d3                                                       | 1                    | μM           |
| SAM_d3                                                                | 4                    | μM           |
| DMG_d6                                                                | 400                  | μM           |
| betaine_d11                                                           | 1000                 | μM           |
| choline_d9                                                            | 400                  | μM           |
| 5-MTHF_ <sup>13</sup> C <sub>5</sub>                                  | 4                    | μM           |

**Table S4** Summary of HPLC settings

|                          |                                            |     |     |
|--------------------------|--------------------------------------------|-----|-----|
| Injection volume         | 10 $\mu$ L                                 |     |     |
| LC column temperature    | Room temperature                           |     |     |
| Mobile Phase             | A – 5 mM PFHA in water<br>B – Acetonitrile |     |     |
| Pre clean needle wash 1  | ACN/H <sub>2</sub> O (50/50; v/v)          |     |     |
| Post clean needle wash 2 | ACN/H <sub>2</sub> O (90/10; v/v)          |     |     |
| Mobile phase flow        | 0.4 mL/min                                 |     |     |
| Gradient                 | Time (min)                                 | % A | % B |
|                          | 0.0                                        | 95  | 5   |
|                          | 0.5                                        | 95  | 5   |
|                          | 8                                          | 5   | 95  |
|                          | 10.0                                       | 5   | 95  |
|                          | 11.0                                       | 95  | 5   |
|                          | 13.0                                       | 95  | 5   |
| Total run time (min)     | 13.0 min                                   |     |     |

**Table S5** Summary of MS settings

|                        |                               |
|------------------------|-------------------------------|
| Source type            | ESI+                          |
| Spray voltage          | 4 kV                          |
| Vaporizer temperature  | 200 °C                        |
| Sheath gas pressure    | 10 units                      |
| Ion sweep gas pressure | 0 units                       |
| Auxiliary gas pressure | 5 units                       |
| Capillary temperature  | 350 °C                        |
| S-lens RF              | used tune S-lens values       |
| CID gas                | Argon, quality 5.0, 1.5 mTorr |
| Scan width             | 0.5 s                         |
| Scan time              | 0.02 s                        |

**Table S6** Matrix effects % (ME) estimated in spiked plasma and CSF samples with labeled internal standards

| <b>Analyte</b>     | <b>ME % in plasma</b> | <b>ME % in CSF</b> |
|--------------------|-----------------------|--------------------|
| homocysteic acid   | 120.2                 | 32.1               |
| taurine            | 105.9                 | 10.6               |
| serine             | -11.4                 | -24.5              |
| total cysteine     | 2.4                   | -22.7              |
| glycine            | -10.1                 | -19.7              |
| total homocysteine | 6.5                   | -7.0               |
| riboflavin         | 25.6                  | -3.0               |
| methionine         | -2.8                  | 7.3                |
| pyridoxine         | -11.9                 | -8.6               |
| cystathionine      | -0.5                  | -9.1               |
| SAH                | -6.4                  | -3.8               |
| pyridoxamine       | 0.7                   | -19.6              |
| SAM                | -3.0                  | -6.3               |
| DMG                | -14.4                 | -30.0              |
| betaine            | -15.1                 | -26.3              |
| choline            | -35.7                 | -23.2              |
| 5-MTHF             | -73.3                 | -36.9              |
